# Supplementary material
Source: publisher figshare collection journal article supplement (https://tandf.figshare.com/ndownloader/files/16263374)
Supplement: Supplementary file 1 [file 16263374]

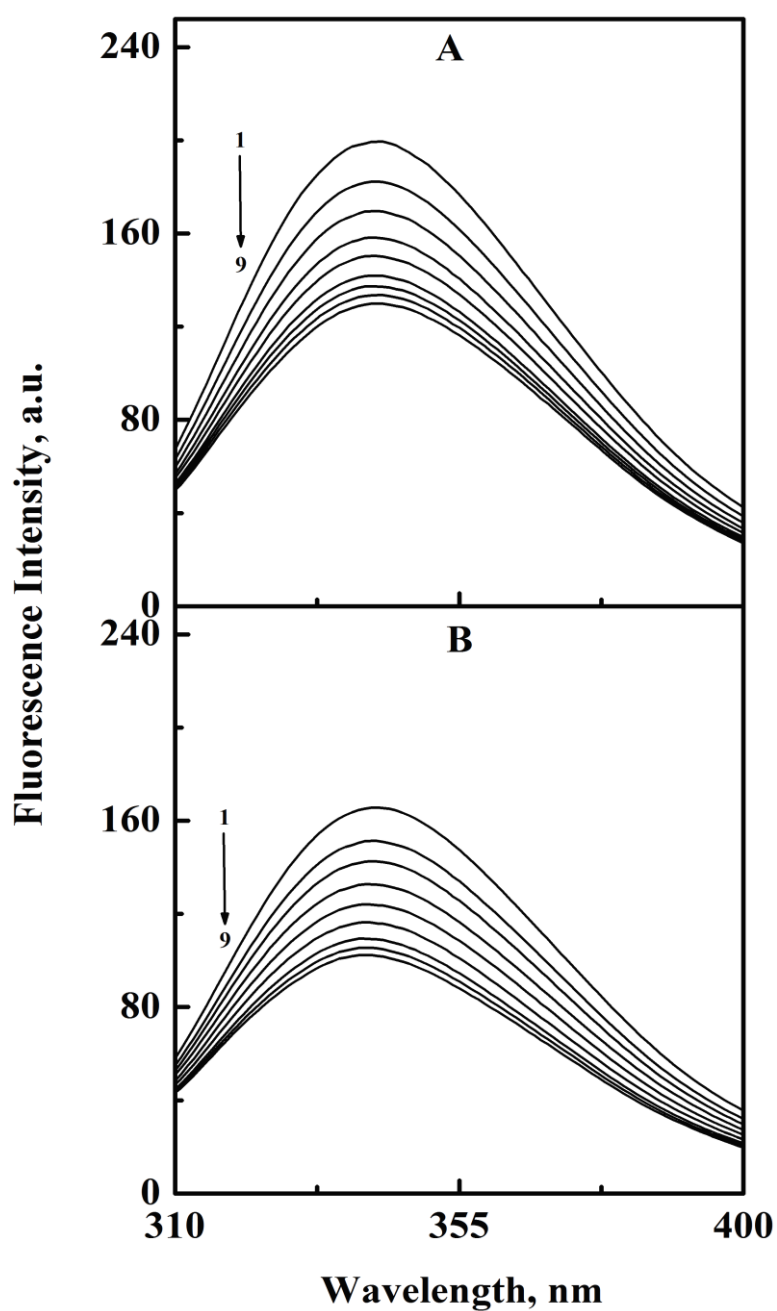

**Supplementary Figure 1.** MNS-induced fluorescence quenching results of 3  $\mu\text{M}$  HSA in the absence (top spectrum) and upon addition of increasing (6–48  $\mu\text{M}$  with 6  $\mu\text{M}$  intervals) MNS concentrations (spectra 2–9), as studied in PB 7.4 at (A) 288 K and (B) 308 K, using  $\lambda_{\text{exc}}$  of 295 nm.

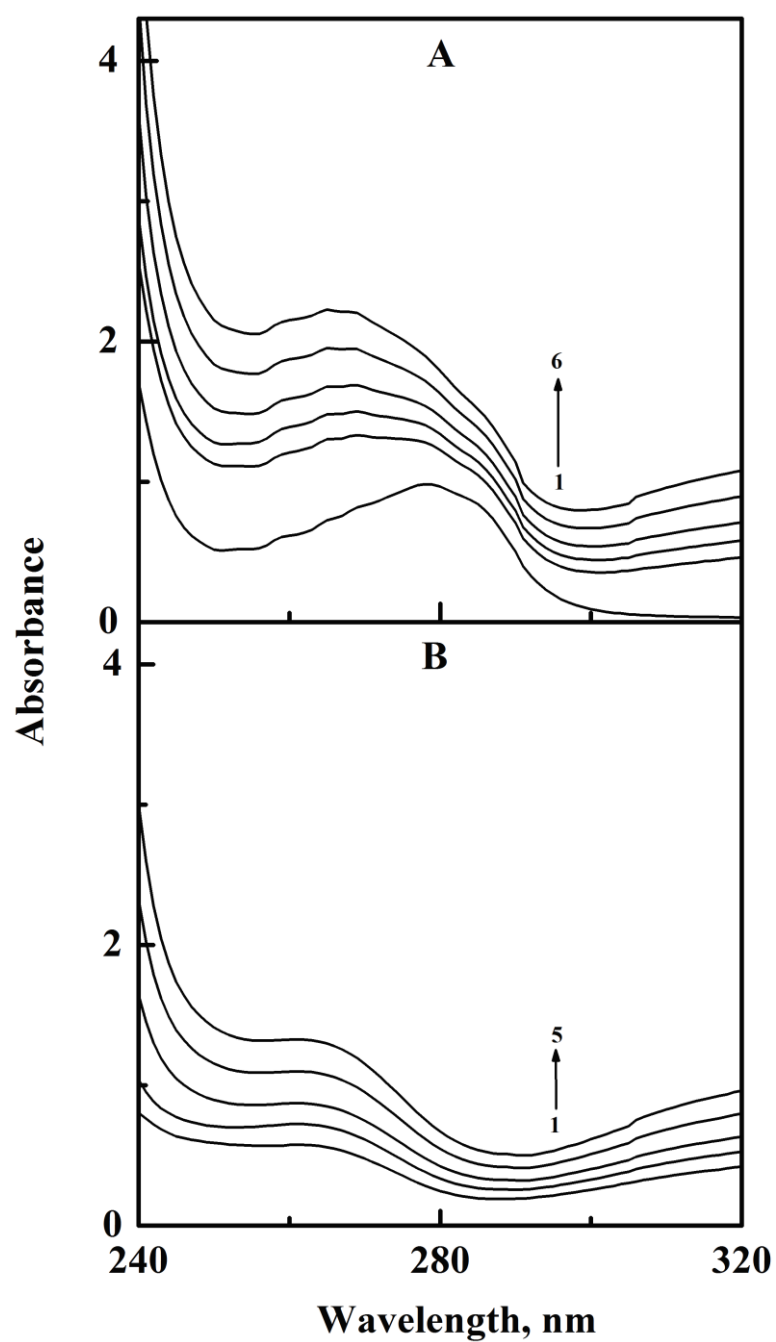

**Supplementary Figure 2.** (A) UV-vis absorption spectra of 25  $\mu$ M HSA (spectrum '1') and MNS:HSA mixtures in a molar ratio of 1:1, 4:1, 8:1, 12:1 and 16:1 (spectra 2–6). (B) UV-vis absorption spectra of pure MNS solutions with similar concentrations (spectra 1–5). These spectra were obtained in PB 7.4 at 298 K.
